# Supplementary material for: The Drosophila Cadherin Fat Regulates Tissue Size and Planar Cell Polarity through Different Domains
Source: PubMed Central journal article supplement (PMC3647076; doi:10.1371/journal.pone.0062998), 2013-05-07

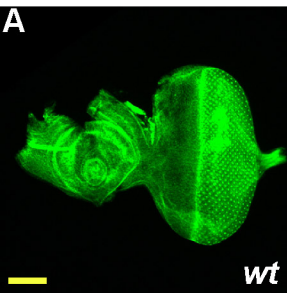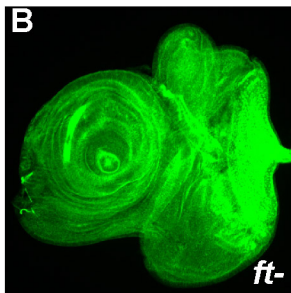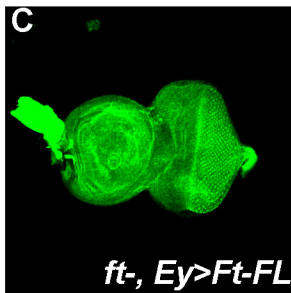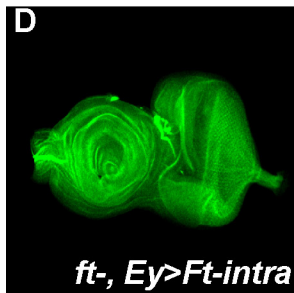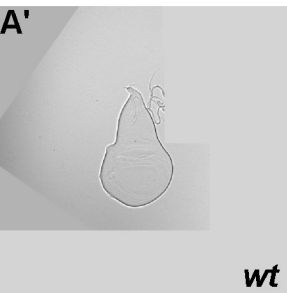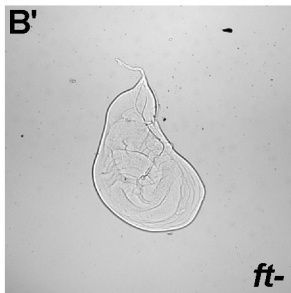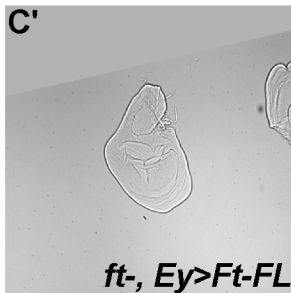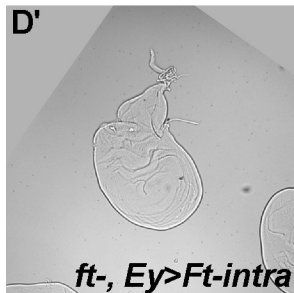

Supplement: pone.0062998.s001.pdf [file pone.0062998.s001.pdf]
